# Supplementary material for: Rootstocks with Different Tolerance Grade to Citrus Tristeza Virus Induce Dissimilar Volatile Profile in Citrus sinensis and Avoidance Response in the Vector Aphis gossypii Glover
Source: MDPI journal article supplement (doi:10.3390/plants11243426), 2022-12-08
Supplement: s1 [file s1]

# Supplementary material

**Table S1** Tukey multiple pairwise-comparison values of behavioral bioassays among scion/rootstock combinations studied. CS: *Citrus sinensis*; CV: Volkamer lemon; FO: For-ner-Alcaide no. 5; CC: Carrizo citrange; CA: *Citrus aurantium*.

| Samples        | diff  | lwr       | upr         | <i>p</i> value | <i>p</i> adj | <i>p</i> signif |
|----------------|-------|-----------|-------------|----------------|--------------|-----------------|
| CC+CS vs CA+CS | -4.75 | -8.795033 | -0.70496732 | 0.0033         | 0.01         | **              |
| CV+CS vs CA+CS | -4.00 | -8.045033 | 0.04503268  | 0.0121         | 0.05         | *               |
| FO+CS vs CA+CS | -4.00 | -8.045033 | 0.04503268  | 0.0121         | 0.05         | *               |
| CV+CS vs CC+CS | 0.75  | -3.295033 | 4.79503268  | 0.626          | 0.96         | ns              |
| FO+CS vs CC+CS | 0.75  | -3.295033 | 4.79503268  | 0.626          | 0.96         | ns              |
| FO+CS vs CV+CS | 0.00  | -4.045033 | 4.04503268  | 1              | 1.00         | ns              |

diff: difference between means of the two groups

lwr, upr: the lower and the upper end point of the confidence interval at 95% (default)

*p* adj (Bonferroni): *p*-value after adjustment for the multiple comparisons.

\* *p* < 0.05; \*\* *p* < 0.01

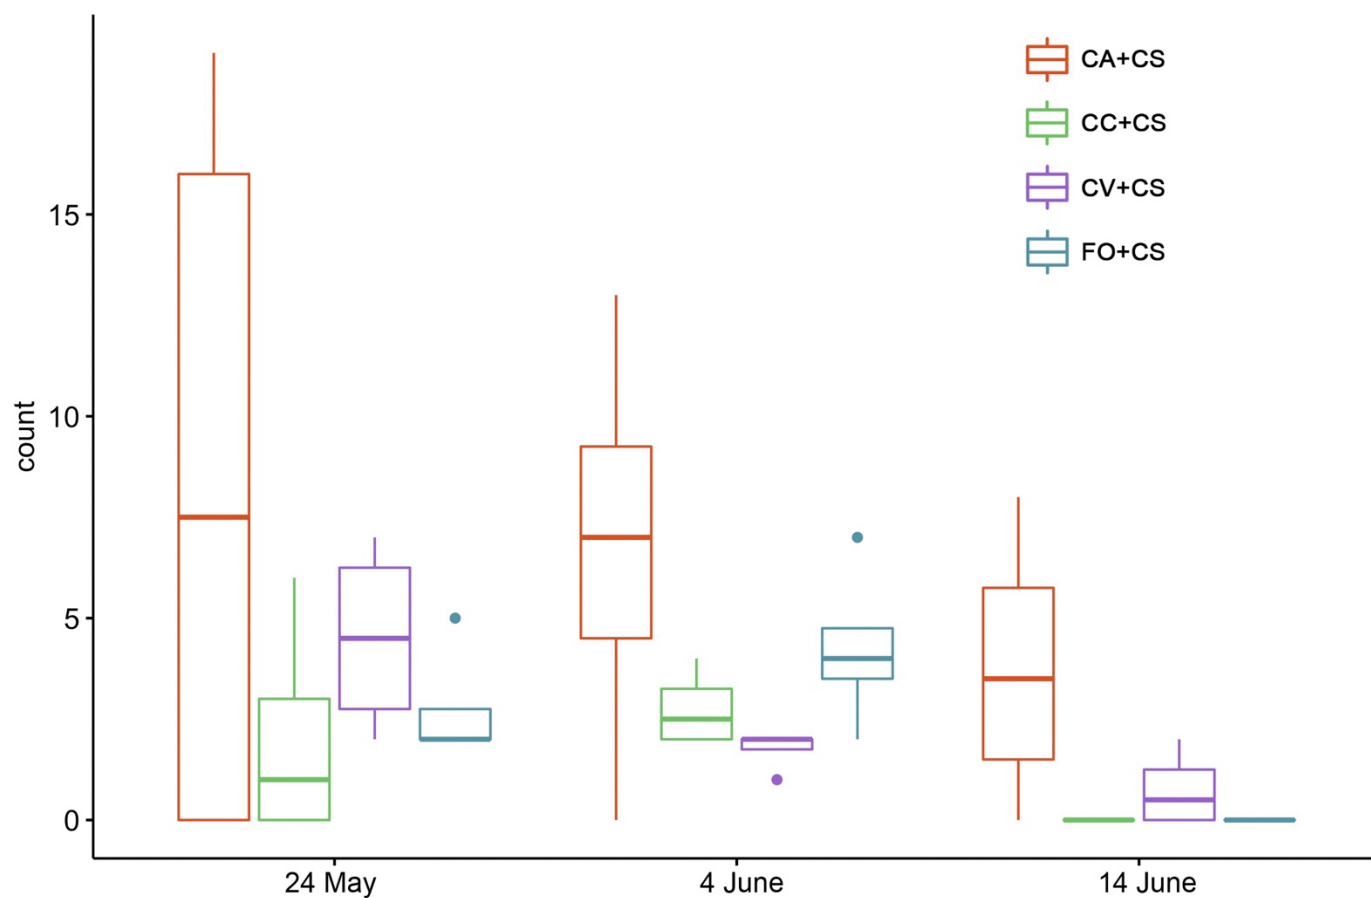

**Figure S1** Behavioral bioassays developed on the *Citrus sinensis* (CS) plants grafted on the four different rootstocks studied. The number of infested leaves in *Citrus sinensis* plants grafted on different rootstocks for each timepoint was reported. CV: Volkamer lemon; FO: Forner-Alcaide no. 5; CC: Carrizo citrange; CA: *Citrus aurantium*.

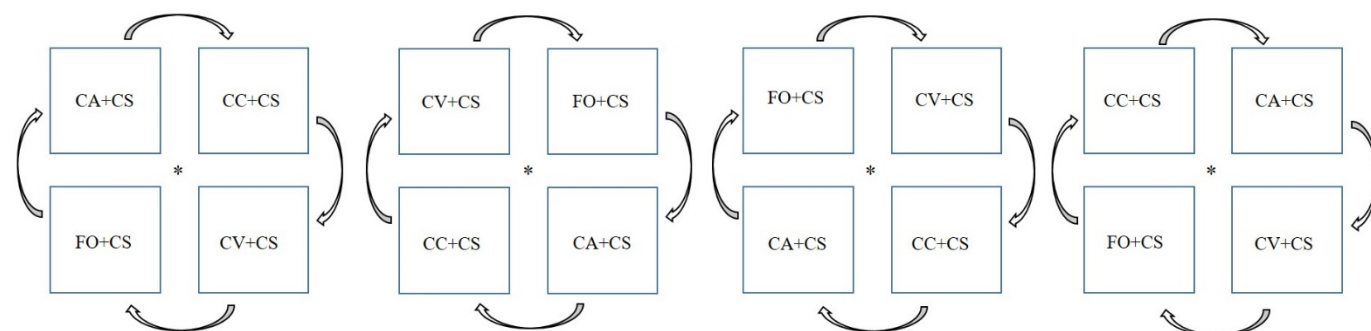

\* = aphids release point

Figure S2 Schematic draw of the cage, size 2.00 × 1.05 × 1.60 m, used for the behavioral bioassays (upper view) on scion/rootstock combinations investigated. **CS:** *Citrus sinensis*; **CV:** Volkamer lemon; **FO:** Forner-Alcaide no. 5; **CC:** Carrizo citrange; **CA:** *Citrus aurantium*.
